CORRECTION

## Correction: Different dry-wet pulses favor different functional strategies: A test using tropical dry forest tree species

Flor Vega-Ramos, Lucas Cifuentes, Fernando Pineda-García, Todd Dawson, Horacio Paz

The following information is missing from the Funding statement: H. Paz was also supported by a PASPA, UNAM sabbatical fellowship.

### Reference

1. Vega-Ramos F, Cifuentes L, Pineda-García F, Dawson T, Paz H. Different dry-wet pulses favor different functional strategies: a test using tropical dry forest tree species. PLoS One. 2024;19(12): e0309510. <https://doi.org/10.1371/journal.pone.0309510> PMID: [39625971](https://pubmed.ncbi.nlm.nih.gov/39625971/)

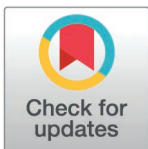

### OPEN ACCESS

**Citation:** Vega-Ramos F, Cifuentes L, Pineda-García F, Dawson T, Paz H (2025) Correction: Different dry-wet pulses favor different functional strategies: A test using tropical dry forest tree species. PLoS ONE 20(4): e0323025. <https://doi.org/10.1371/journal.pone.0323025>

**Published:** April 22, 2025

**Copyright:** © 2025 Vega-Ramos et al. This is an open access article distributed under the terms of the [Creative Commons Attribution License](https://creativecommons.org/licenses/by/4.0/), which permits unrestricted use, distribution, and reproduction in any medium, provided the original author and source are credited.
